# Supplementary figures and images for: The Predictability of Cystatin C for Peripheral Arterial Disease in Chinese Population with Type 2 Diabetes Mellitus
Source: Hindawi journal article supplement (doi:10.1155/2022/5064264), 2022-03-29

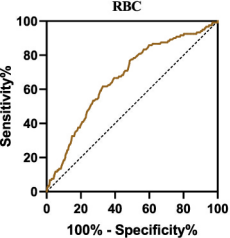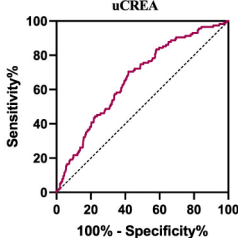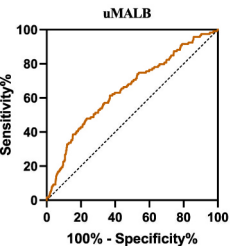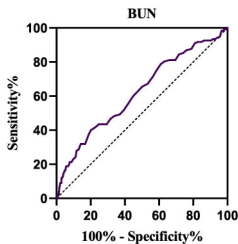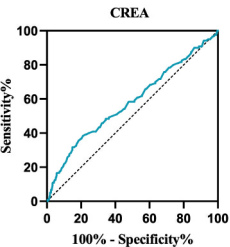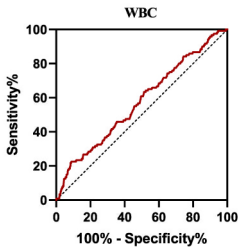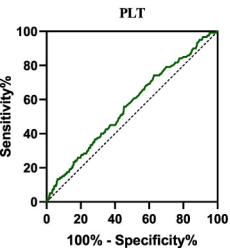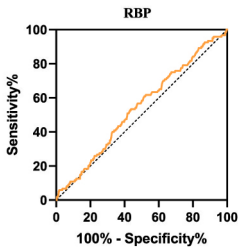

Supplement: f1 [file 5064264.f1.zip]

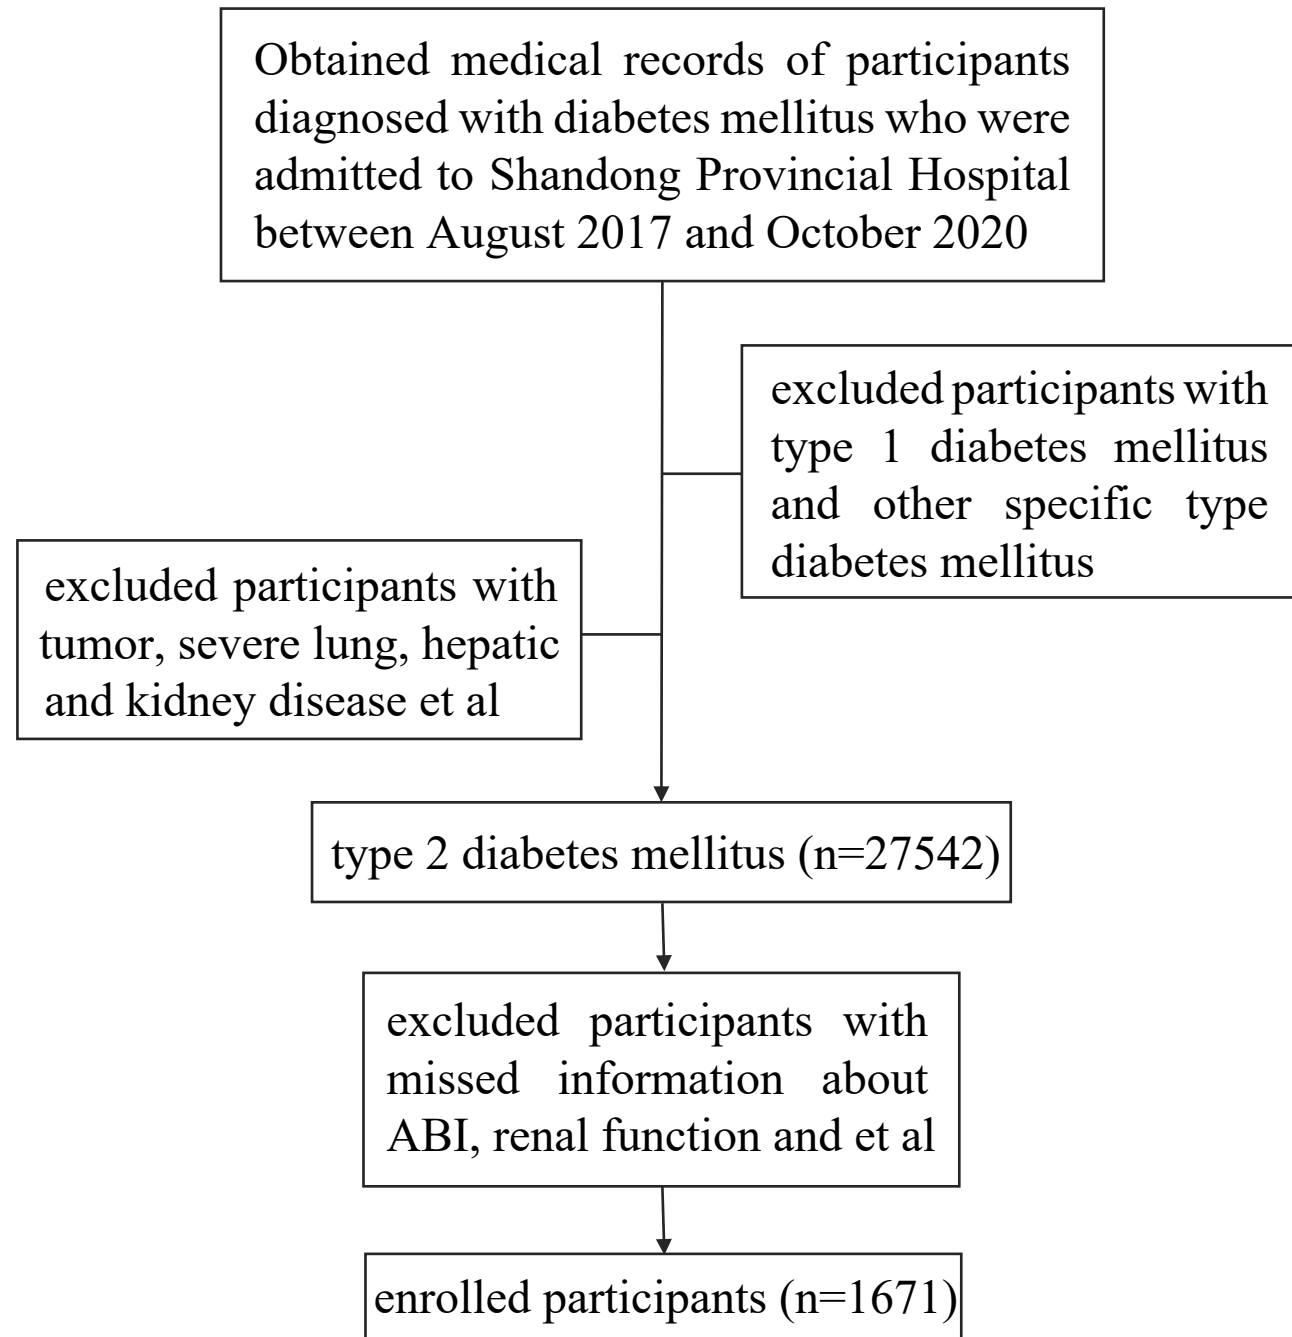

Supplement: f1 [file 5064264.f1.zip]
